# Supplementary material for: Coupling the regional climate model ICON-CLM v2.6.6 to the Earth system model GCOAST-AHOI v2.0 using OASIS3-MCT v4.0
Source: Copernicus journal article supplement (doi:10.5194/gmd-17-7815-2024), 2024-11-07
Supplement: Supplementary file 1 [file gmd-17-7815-2024-supplement.pdf]

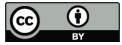

*Supplement of*

## **Coupling the regional climate model ICON-CLM v2.6.6 to the Earth system model GCOAST-AHOI v2.0 using OASIS3-MCT v4.0**

**Ha Thi Minh Ho-Hagemann et al.**

*Correspondence to:* Ha Thi Minh Ho-Hagemann (ha.hagemann@hereon.de)

The copyright of individual parts of the supplement might differ from the article licence.

```

PROGRAM nemogcm
  CALL nemo_init ! Initialize the NEMO environment
  CALL cpl_init ! Initialize the coupling-mode communication
  CALL oasis_init_comp
  CALL oasis_get_localcomm
  CALL sbc_init ! Initialize dynamics, physics
  CALL sbc_cpl_init
  CALL cpl_define
  CALL sbc_cpl_rcv ! Receive coupling fields
  CALL cpl_rcv
  CALL oasis_get
  CALL sbc_blk_core_cpl ! NEW blk_core coupling method (*)
  CALL sbc_ice_lim
  CALL blk_ice_core_tau ! Not sbc_cpl_ice_tau due to new coupling method
  CALL blk_ice_core_flux ! Not sbc_cpl_ice_flux due to new coupling method
  CALL lim_sbc_flux
  CALL sbc_rnf ! Handle run-off
  CALL sbc_final ! Restore SBCs
  CALL sto_par; sto_pts; eos_rab; bn2; zdf_*; eos; zps; ldf_*; dyn_*; tra_*; dia_*
  CALL dia_wri; CALL stp_ctl
  CALL sbc_cpl_snd ! Send coupling fields
  CALL cpl_snd
  CALL oasis_put
ENDDO TIME_LOOP
CALL dia_obs_wri ! Write observation diagnostics
CALL nemo_closefile ! Close remaining open files
CALL cpl_finalize ! Finalize the coupling
CALL oasis_terminate
END nemogcm

```

SUBROUTINE cpl\_define

CALL oasis\_def\_partition

CALL oasis\_def\_var (send)

CALL oasis\_def\_var (receive)

CALL oasis\_enddef

1

S1: Flowchart of NEMO v3.6 with the OASIS3-MCT coupling interface (red text). In the default OASIS interface of NEMO v3.6, sensible and latent heat fluxes are passed from the atmospheric model. With the new coupling method (\*), NEMO receives state variables (i.e. air temperature, humidity, etc.) to calculate the fluxes using the bulk formula (blk\_core) which is available in NEMO v3.6 for the stand-alone mode.

```

PROGRAM hd_driver
  CALL p_start      ! Initialize the HD environment
  CALL oas_hd_init ! Initialize the coupling-mode communication
  CALL oasis_init_comp
  CALL oasis_get_localcomm
  CALL p_init_communicators ! Communicator set up
  CALL machine_setup
  CALL config_hd;      CALL init_manager
  CALL init_times;    CALL hd_init_dims
  CALL hd_init_forcing; CALL init_hydrology
  CALL read_coupling_info
  CALL hd_init_io
  CALL oas_hd_define
  TIME_LOOP: DO
    CALL time_set;      CALL write_date
    CALL hd_receive fld ! Receive coupling fields
    CALL oas_hd_rcv
    CALL oasis_get
    CALL hydrology_model ! Discharge calculations
    CALL dis_to_ocean ! Transfer HD model river discharge to ocean grid
    CALL hd_send fld ! Send coupling fields
    CALL oas_hd_snd
    CALL oasis_put
    CALL hd_write_output ! Write the output
    CALL hydrology_restart ! Write restart file
    CALL time_reset
  ENDDO TIME_LOOP
  CALL cleanup_hydrology ! Cleaning up
  CALL hd_highres_close ! Close files
  CALL p_stop ! MPI finalization
  CALL oas_hd_finalize ! Finalize the coupling
  CALL oasis_terminate
END hd_driver

```

```

SUBROUTINE oas_hd_define
  CALL decomp_def
  CALL oasis_def_partition
  CALL oasis_def_var (send)
  CALL oasis_def_var (receive)
  CALL oasis_enddef

```

2

S2: Flowchart of HD v5.1 with the OASIS3-MCT coupling interface (red text).

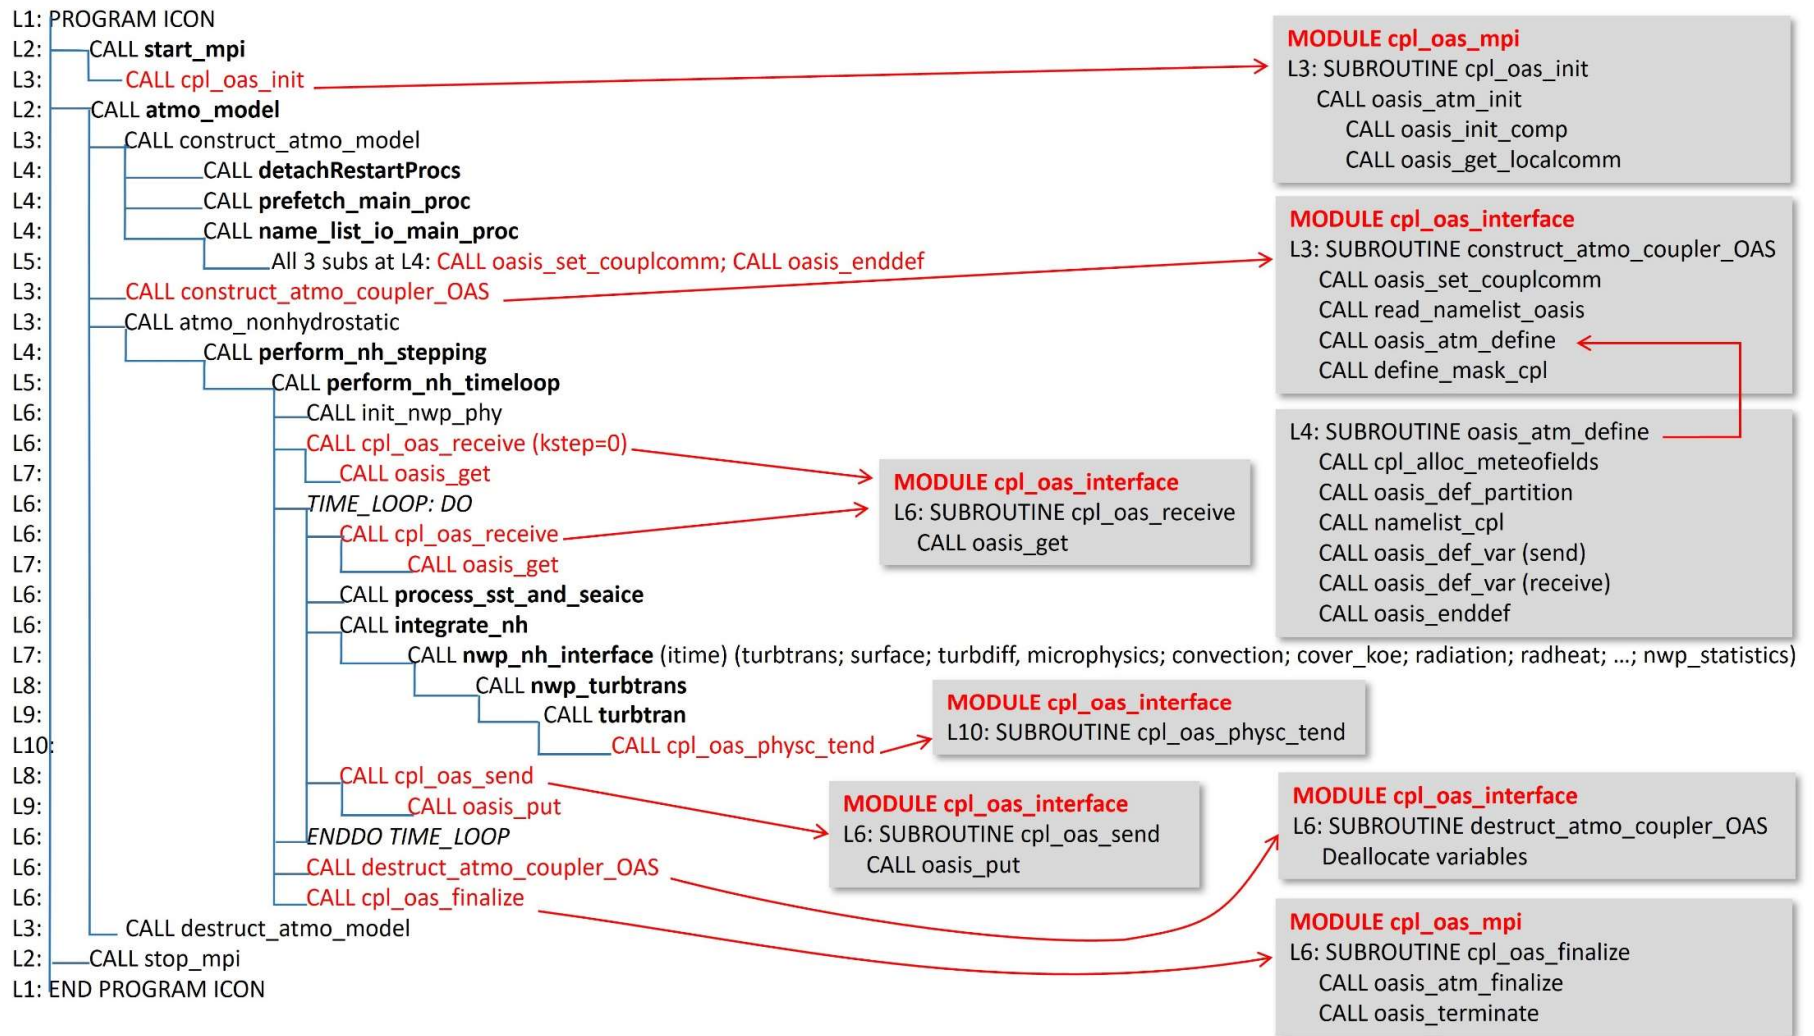

3

S3: Flowchart of ICON-NWP/ICON-CLM with the OASIS3-MCT coupling interface. Red text shows the OASIS interface. Bold text displays the modified subroutines of ICON due to the coupling. "L1" indicates Level 1 – the main ICON program, etc.

Table S1: New OASIS coupling files added to ICON-NWP/ICON-CLM.

| File | Directory        | Fortran File                   | Modules/Subroutines (Sub.)                                       | Description                                                                                |
|------|------------------|--------------------------------|------------------------------------------------------------------|--------------------------------------------------------------------------------------------|
| 1    | src/atm_phy_nwp/ | cpl_oas_vardef.f90             | Module cpl_oas_vardef                                            | Coupling variables definition                                                              |
| 2    |                  | cpl_oas_mpi.f90                | Module cpl_oas_mpi<br>Sub. cpl_oas_init<br>Sub. cpl_oas_finalize | Initialization/ Finalization for OASIS<br>OASIS initialize<br>OASIS finalize and terminate |
| 3    |                  | cpl_oas_interface.f90          | Module cpl_oas_interface                                         | Main subroutines of OMCI                                                                   |
|      |                  |                                | Sub. construct_atmo_coupler_OAS                                  | Definition: OASIS decomposition, reading coupling namelist, definite coupling mask         |
|      |                  |                                | Sub. cpl_oas_receive                                             | Data exchange: Receive fields from OASIS                                                   |
|      |                  |                                | Sub. cpl_oas_send                                                | Data exchange: Send fields to OASIS                                                        |
|      |                  |                                | Sub. cpl_oas_physc_tend                                          | Update momentum, latent and sensible heat fluxes                                           |
|      |                  | Sub. destruct_atmo_coupler_OAS | Deallocate coupling variables                                    |                                                                                            |

4 Table S2: Modified ICON's files due to the OASIS3-MCT coupling interface.

| File | Directory                    | Fortran File                   | Modules/Subroutines (Sub.)                                | Description                                                                                                        |
|------|------------------------------|--------------------------------|-----------------------------------------------------------|--------------------------------------------------------------------------------------------------------------------|
| 1    | src/parallel_infrastructure/ | mo_mpi.f90                     | Module mo_mpi<br>Sub. start_mpi                           | Initialization of ICON                                                                                             |
| 2    | src/drivers/                 | mo_atmo_model.f90              | Module mo_atmo_model<br>Sub. atmo_model                   | Atmospheric model ICON                                                                                             |
| 3    | src/io/restart/              | mo_restart.f90                 | Module mo_restart<br>Sub. detachRestartProcs              | Detach the restart processes                                                                                       |
| 4    | src/io/atmo/                 | mo_async_latbc.f90             | Module mo_async_latbc<br>Sub. prefetch_main_proc          | Initialize the prefetch processor                                                                                  |
| 5    | src/io/shared/               | mo_name_list_output.f90        | Module mo_name_list_output<br>Sub. name_list_io_main_proc | Initialize name list output                                                                                        |
| 6    | src/lnd_phy_nwp/             | mo_nwp_lnd_types.f90           | Module mo_nwp_lnd_types                                   | Declare new variable sea ice albedo "alb_si_ext" to receive from NEMO                                              |
| 7    | src/lnd_phy_nwp/             | mo_nwp_lnd_state.f90           | Module mo_nwp_lnd_state<br>Sub. new_nwp_lnd_diag_list     | Declare new variable sea ice albedo "alb_si_ext" to write to output                                                |
| 8    | src/lnd_phy_nwp/             | mo_nwp_sfc_utils.f90           | Module mo_nwp_sfc_utils                                   | Initializes and update surface variables                                                                           |
|      |                              |                                | Sub. nwp_surface_init                                     | Initializes sea ice albedo by "alb_si_ext" from NEMO                                                               |
|      |                              |                                | Sub. process_sst_and_seaice                               | Update sea ice albedo by "alb_si_ext" from NEMO                                                                    |
| 9    | src/atm_dyn_iconam/          | mo_nh_stepping.f90             | Module mo_nh_stepping<br>Sub. perform_nh_timeloop         | Initializes and controls the time stepping in the nonhydrostatic model<br>Time looping of the nonhydrostatic model |
| 10   | src/atm_phy_nwp/             | mo_nwp_turbtrans_interface.f90 | Module mo_nwp_turbtrans_interface<br>Sub. nwp_turbtrans   | Interface between nwp_nh_interface to the turbulence parameterisations                                             |
| 11   | src/atm_phy_schemes/         | turb_transfer.f90              | Module turb_transfer<br>Sub. turbtran                     | Computing the coefficients for turbulent transfer                                                                  |

*Table S3: Number of requested nodes/processors for performance tests of GCOAST-AHOI on Levante. NPX and NPY are the processors for NEMO corresponding to x and y dimensions, respectively.*

| <b>Case</b> | <b>Nodes</b> | <b>Total processors</b> | <b>Processors for ICON</b> | <b>Processors for NEMO</b>             | <b>Processors for HD</b> |
|-------------|--------------|-------------------------|----------------------------|----------------------------------------|--------------------------|
| <b>A</b>    | 25           | 3200                    | 1599                       | $NPX \times NPY = 40 \times 40 = 1600$ | 1                        |
| <b>B</b>    | 30           | 3840                    | 2239                       | $NPX \times NPY = 40 \times 40 = 1600$ | 1                        |
| <b>C</b>    | 30           | 3840                    | 1839                       | $NPX \times NPY = 50 \times 40 = 2000$ | 1                        |
| <b>D</b>    | 40           | 5120                    | 3519                       | $NPX \times NPY = 40 \times 40 = 1600$ | 1                        |
| <b>E</b>    | 40           | 5120                    | 2719                       | $NPX \times NPY = 60 \times 40 = 2400$ | 1                        |

## 6 *S4: Interface structure of OMCI*

7 We can divide the OMCI into four main processes: Initialization, Definition, Data exchange, and  
8 Finalization. Box B1 (Fig. 2) belongs to the Initialization phase of OASIS in ICON. In this phase, the ICON file  
9 `mo_mpi.f90` is modified, and the file `cpl_oas_mpi.f90` of OMCI is newly created (see Supplementary Tables  
10 S1 and S2). In `mo_mpi.f90`, the `start_mpi` subroutine from ICON calls the `cpl_oas_init` subroutine from  
11 OMCI, which in turn calls two subroutines from the OASIS library (`oasis_init_comp` and  
12 `oasis_get_localcomm`). The subroutine `cpl_oas_init` (belonging to `cpl_oas_mpi.f90`) is similar to the  
13 subroutine `oas_cos_init` of the unified OASIS interface in CCLM (Will et al., 2017).

14 Boxes B2 and B3 belong to the Definition phase to define and allocate all coupling fields. In this phase,  
15 three ICON files are slightly modified by calling `oasis_set_couplcomm` and `oasis_enddef` from the OASIS  
16 library (rows 3-5 in Table S2). In addition, some code lines are added to three ICON modules to declare the  
17 new sea ice albedo variable “`alb_si_ext`” to be sent to NEMO (row 6 Table S2).

18 Two additional files from OMCI (`cpl_oas_vardef.f90` and `cpl_oas_interface.f90`) are added to the ICON  
19 source code. Module `cpl_oas_vardef` simply contains a definition of all coupling variables. Part of the  
20 `cpl_oas_interface` module is the `construct_atmo_coupler_OAS` subroutine which is called by the ICON  
21 `atmo_model` subroutine (`src/drivers/mo_atmo_model.f90`). The subroutine `construct_atmo_coupler_OAS`  
22 also calls `oasis_set_couplcomm` before calling three other subroutines of OMCI (i.e. `read_namelist_oasis`,  
23 `oasis_atm_define` and `define_mask_cpl`) to define the decomposition of ICON and to read in the ocean  
24 domain masked on the atmospheric domain of ICON (i.e. the coupling mask, variable `mask_cpl`) from a  
25 netcdf file named `atmin.nc`.

26 Calling `oasis_set_couplcomm` in the Definition phase is a peculiarity of ICON compared to CCLM, NEMO  
27 and HD. The reason for this is that ICON devotes one processor out of the total number of processors to  
28 reading the lateral boundary conditions (by setting `num_prefetch_proc=1` in ICON’s `parallel_nml` namelist).  
29 This single processor should be seen by OASIS, but only in the Initialization phase. The OASIS subroutine  
30 `oasis_set_couplcomm`, called after the Initialization, helps to set a coupling communicator in the case that  
31 only a subset of the component processes is involved in the coupling. In this case, the “subset” is all the  
32 processors allocated for ICON except the one defined by `prefetch_proc`. In the ICON-CLM versions prior to  
33 2.6.4, it is possible to set `num_prefetch_proc=0`, so that the call to `oasis_set_couplcomm` in the Definition  
34 phase would not be necessary. However, since version 2.6.4, `num_prefetch_proc=1` is mandatory.  
35 Therefore, `oasis_set_couplcomm` must be called, otherwise the coupled model will hang after the  
36 Initialization.

37 The exchanged variables (see Fig. 1) are listed in the OMCI subroutine `oasis_atm_define` which are read  
38 in from a namelist file `namelist_cpl_atm_oce` to define which variables are sent and received. The variable  
39 names used in ICON, corresponding to the exchanged variables, are similar to the variables listed in Table 1  
40 of Bauer et al. (2021).

41 Boxes B4, B5, and B7 belong to the Data exchange phase while the coupled system is running. In this  
42 phase, subroutines in the OMCI module `cpl_oas_interface` are used, and five ICON modules are modified  
43 (rows 7-9 Table S2). The five ICON modules are highlighted in red in Fig. 2 from level 4 to 9, under the  
44 subroutine `perform_nh_stepping`. Variables (i.e. sea surface temperature, sea ice fraction and albedo)  
45 received from NEMO via OMCI by calling the subroutine `cpl_oas_receive` are updated to the newer values  
46 at each ICON time step within the subroutine `perform_nh_timeloop` through several steps. They are first  
47 updated in the subroutine `process_sst_and_seaice`, and then used to modify the surface roughness in the  
48 turbulent scheme via the subroutine `turbtran` (`turb_transfer.f90`) of ICON. The subroutine `turbtran` is called  
49 by the module `nwp_turbtrans`, which in turn is called by the subroutine `nwp_nh_interface` inside the  
50 subroutine `integrate_nh`. After the subroutine `integrate_nh`, the subroutine `cpl_oas_send` is called to pass  
51 the defined exchange variables from ICON to NEMO and HD via OMCI.

52 Box B6 in Fig. 2 indicates the Finalization phase for OASIS. Here, two subroutines  
53 `destruct_atmo_coupler_OAS` and `cpl_oas_finalize` are called. The subroutine `destruct_atmo_coupler_OAS`  
54 simply deallocates all coupling variables. OMCI’s subroutine `cpl_oas_finalize` calls two OASIS subroutines  
55 `oasis_atm_finalize` and `oasis_terminate`, as in the Finalization phase in CCLM, NEMO and HD. Alternatively,

56 the Finalization box can be placed at level 3, before destruct\_atmo\_model of ICON. However, leaving the  
57 Finalization box at level 6 is more flexible, e.g. for testing the behavior of ICON when finalizing OASIS at the  
58 ktstep=nsteps\_total or ktstep=nsteps\_total-1.

59

60 *S5: Compile ICON with OMCI on Levante.*

61 a. Environment settings:

```
NETCDFF_DIR=/sw/spack-levante/netcdf-fortran-4.5.3-k6xq5g
NETCDFC_DIR=/sw/spack-levante/netcdf-c-4.8.1-2k3cmu
ECCODES_ROOT=/sw/spack-levante/eccodes-2.21.0-3ehkbb
HDF5_DIR=/sw/spack-levante/hdf5-1.12.1-tvymb5
SZIP_ROOT=/sw/spack-levante/libaec-1.0.5-gij7yv
MKL_ROOT=/sw/spack-levante/intel-oneapi-mkl-2022.0.1-ttdktf/mkl/2022.0.1
MPIINC=/sw/spack-levante/openmpi-4.1.2-yfwe6t/include
MPILIB=/sw/spack-levante/openmpi-4.1.2-yfwe6t/lib
MODULES=""intel-oneapi-compilers/2022.0.1-gcc-11.2.0 openmpi/4.1.2-intel-2021.5.0""
GCCLIB="/sw/spack-levante/gcc-11.2.0-7jqrc/lib64"
PYTHON="/sw/spack-levante/mambaforge-4.11.0-0-Linux-x86_64-sobz6z/bin/python3"
```

62 b. Compiling:

63 The environment must be the same for the coupler OASIS3-MCT v4.0 as well as for the three model  
64 components ICON, NEMO and HD. OASIS3-MCT v4.0 is compiled first and will be used as the library to be  
65 linked to the three models. To compile ICON with OMCI, one must adapt the configure file and  
66 icon/config/dkrz/levante.intel-2021.5.0\_OASIS (see <https://doi.org/10.5281/zenodo.10877618>).

67 The command to compile ICON with OMCI using the setup levante.intel-2021.5.0\_OASIS is:

```
icon/config/dkrz/levante.intel-2021.5.0_OASIS --disable-coupling --disable-ocean --disable-jsbach --enable-
coupling_OAS --disable-art --enable-ecrad
```

68 Note that “--disable-coupling --disable-ocean --disable-jsbach” is not to couple with YAC, ICON-O and  
69 JSBACH, respectively. Meanwhile “--enable-coupling\_OAS --enable-ecrad” is to switch on OMCI and to run  
70 ICON with the radiation scheme ecRad. Consequently, a binary file icon is located under the directory  
71 icon/bin, like in the case without OASIS. ICON with OMCI has also successfully been compiled on other  
72 machines of the same architecture as Levante and on NEC-Aurora at DWD.

73

74 *S6: Prepare OASIS input files.*

75 a. Grid and mask files

76 Using CDO and NCO libraries is a convenient manner to produce information about grids and masks used by  
77 OASIS (i.e. grids.nc and masks.nc), as well as the remapping files requested by OASIS before running the  
78 coupled system. The file grids.nc should contain longitude (Lon) and latitude (Lat) of the ICON, NEMO and  
79 HD grids. Although three models are considered, there are five grids which are named icon, nemo, nico,  
80 nmhd, and hdmd. Lon and Lat of icon and nico have the same dimension of (1, 231660). Lon and Lat of  
81 nemo and nmhd have the same dimension of (902, 777). Lon and Lat of hdmd have the dimension of (960,  
82 540). The reason to create five grids is that the masks of them are different. OASIS will do the  
83 interpolation/exchange on points which have the mask value of zero and ignore the points with mask of  
84 one. File masks.nc contains five masks i.e. icon.msk, nemo.msk, nico.msk, nmhd.msk and hdmd.msk as  
85 following:

- 86 • The masks icon.msk and hdmd.msk are both zero. They are used for the source grids (see namcouple in S6  
87 below); therefore, OASIS should send results from all points to other grids.
- 88 • The nemo.msk has values of zero on the ocean grid points and values of one on the land points. nemo is  
89 also a source grid, but results are only available on ocean points.
- 90 • The nico.msk has zero values only in the area overlapped between the NEMO domain and the ICON  
91 domain, i.e. the dark blue area in Figure 3. The other grid points have a value of one, thus, sea surface



92 temperature or sea ice fraction from NEMO/LIM3 is updated in ICON only over grid points inside of the  
93 dark blue area, also known as the coupling domain.

94 • The nmhd.msk has values of one everywhere, only on river mouth points the values are zero.

95

96 b. Remapping files

97 Remapping files are netcdf files containing interpolation matrix, based on that OASIS can exchange data  
98 between different model grids. The remapping files can be either generated by OASIS or prepared manually.  
99 Applying the first method, OASIS does the interpolation using the *SCRIPR* function as described in the  
100 *namcouple* file, GROUP 2 (see S6). Options for the *SCRIPR* function can be DISTWGT, GAUSWGT, BILINEAR or  
101 CONSERV. With this method, the grids.nc and masks.nc files will be taken into account, and a remapping file  
102 (e.g. *rmp\_icon\_to\_hdmd\_DISTWGT.nc*) will be generated. One can conduct one month simulation with the  
103 coupled model and wait until the remapping file is generated, which would take about 10-20 minutes. Then  
104 one can stop the simulation and rerun the coupled model using the saved remapping file and the *MAPPING*  
105 function, as shown in GROUP 1 or GROUP 3 of S6.

106 Method 2 is to prepare the remapping files using CDO functions outside and before running the coupled  
107 model. First, we extracted Lon and Lat information of grids nemo, nico and hdmd from the above-  
108 mentioned grids.nc file to obtain the nemogrid.nc, nicogrid.nc, hdmhgrid.nc, respectively. Specifically, for  
109 the icogrid.nc, the Lon and Lat of grid icon in grids.nc must be converted to a 1-dimension field of length  
110 “ncells” (similar to clon (231660) and clat (231660)), adding vertices information from the ICON grid. We  
111 use these netcdf files in the script *remap\_ICON\_NEMO\_HD.sh* to generate several remapping files  
112 (*rmp\_\*CONSERV.nc* and *rmp\_\*DISTWGT.nc*). This script uses “gencon” and “gendis” functions of CDO to  
113 produce the remapping files. Note that the HD grid has no corner lon-lat information, therefore only the  
114 “cdo gendis” can be used for remapping the ICON to HD grid, while “cdo gencon” is applied for the other  
115 two cases. The remapping files are used in the file *namcouple* as shown in GROUP 1 and 3 of S6 below.

```
script remap_ICON_NEMO_HD.sh:
```

```
rm -f rmp_icon_to_nemo_*.nc
```

```
rm -f rmp_nemo_to_nico_*.nc
```

```
rm -f rmp_icon_to_hdmd_*.nc
```

```
CDO gencon,nemogrid.nc icogrid.nc rmp_icon_to_nemo_CONSERV.nc
```

```
CDO gencon,nicogrid.nc nemogrid.nc rmp_nemo_to_nico_CONSERV.nc
```

```
CDO gendis,hdmhgrid.nc icogrid.nc rmp_icon_to_hdmd_DISTWGT.nc
```

116

117 c. File *namcouple*

118 One field of each exchange group (i.e. atmosphere → ocean; atmosphere → river run-off; ocean →  
119 atmosphere; river-runoff → ocean) in the file *namcouple* is given as an example in S6. In total, 19 fields are  
120 exchanged between the three models via OMCI. For all exchanges where ICON is taking part, the *Send\_var*  
121 and *Receive\_var* in the file *namcouple* must be the same to what is defined in the *OMCI/oasis\_atm\_define*  
122 as well as in the *namelist &cpl\_nml* in the *namelist\_cpl\_atm\_oce* file (see example in S7). Coupling time  
123 step is 3600 seconds. LAG=+0 is set in the GROUP 1 meaning NEMO receives output of ICON at every hour,  
124 without any delay. LAG=+100 in GROUP 2 means that HD receives run-off from ICON at every hour plus one  
125 running time step (i.e. 100 seconds) of ICON. For any field which is exchanged with a LAG larger than 0, a  
126 restart file (i.e. *atmin.nc*, *sstoc.nc* or *rivin.nc*) is needed by OASIS. However, one must prepare the file only  
127 once at the first simulation month. These restart files are generated and overwritten by OASIS at the end of  
128 each run. One should, therefore, save the restart files right after any run for each month so that they are  
129 available in case a later re-running of the simulation is desired for a specific month.

130

131

```
#####
$NFIELDS
  19
$SEND
#####
$STRINGS
#####
#   GROUP 1:   ATMOSPHERE --->>> OCEAN
# Field 8: U wind component at 10M [m/s]
# Send_var  Receive_var  Var_number  Coupling_interval(s)  Transformations  Restart_file  Field_Status
U10MtnB     O_WNDI       8           3600                 2                atmin.nc     EXPORTED
231660  1   902  777  icon  nemo  LAG=+0
R 0 R 0
LOCTRANS    MAPPING
INSTANT
rmp_icon_to_nemo_CONSERV.nc src
#####
#   GROUP 2:   ATMOSPHERE --->>> RIVER RUN-OFF
# Field 22: Surface run-off [kg/m2], sum over forecast of 1hr, converted to m/s
# Send_var  Receive_var  Var_number  Coupling_interval(s)  Transformations  Restart_file  Field_Status
RO_StNB     RUNOFF_S      22          3600                 2                atmin.nc     EXPORTED
231660  1   960  540  icon  hdmd  LAG=+100
R 0 R 0
LOCTRANS    SCRIPR
INSTANT
DISTWGT LR SCALAR LATLON 10 4
#####
#   GROUP 3:   OCEAN --->>> ATMOSPHERE
# Field 1: Sea surface temperature [K]
# Send_var  Receive_var  Var_number  Coupling_interval(s)  Transformations  Restart_file  Field_Status
O_TepMix    SSTnB         1           3600                 2                sstoc.nc     EXPORTED
902  777  231660  1   nemo  nico  LAG=+90
R 0 R 0
LOCTRANS    MAPPING
AVERAGE
rmp_nemo_to_nico_CONSERV.nc src
#####
#   GROUP 4:   RIVER RUN-OFF --->>> OCEAN
# Field 19: River discharge [m3/s]: already on NEMO's grid
# Send_var  Receive_var  Var_number  Coupling_interval(s)  Transformations  Restart_file  Field_Status
RDC2NEMO    O_Runoff      19          3600                 1                rivin.nc     EXPORTED
nmhd nmhd LAG=+3600
R 0 R 0
LOCTRANS
AVERAGE
END
```

135 *S8: Example of namelist\_cpl\_atm\_oce*

```

&cpl_nml
!-----
! ATMOSPHERE send      ! OCEAN receive
  atm_snd_u10 = 'U10MtNB' !, 'O_WNDI'
  atm_snd_u10 = 'V10MtNB' !, 'O_WNDJ'
  atm_snd_swd = 'SWDNtNB' !, 'O_SWDN'
  atm_snd_lwd = 'LWDNtNB' !, 'O_LWDN'
  ...
!-----
! ATMOSPHERE send      ! RIVER receive
  atm_snd_ros = 'RO_StNB' !, 'RUNOFF_S'
  atm_snd_rog = 'RO_GtNB' !, 'RUNOFF_G'
!-----
! ATMOSPHERE receive   ! OCEAN send
  atm_rcv_sst = 'SSTfNB' !, 'O_TepMix'
  atm_rcv_ifr = 'FRIfNB' !, 'OlceFrc'
  atm_rcv_ial = 'ALBIfNB' !, 'O_AlbIce'
  ...
/

```

136

137 *S9: Running GCOAST-AHOI.*

138 The command to conduct the experiment using the job scheduling system SLURM installed on Levante is:

```
139 srun -l --hint=nomultithread --distribution=block:cyclic --multi-prog mpmd.lst
```

140 in which mpmd.lst is a text file listing the number of processors given to each model component. For  
 141 example, if 25 nodes are used to run the coupled model on Levante, with each node comprising 128  
 142 processors, the number of processors given to ICON, NEMO and HD can be 1599, 1600 and 1 processor,  
 143 respectively. The mpmd.lst file would look like this:

```

$cat mpmd.lst
0-1598 icon
1599-3198 oceanx
3199-3199 hdmd.x

```

144

145 *S10: Using LUCIA to estimate model computing performance.*

146 To use LUCIA, first step is to compile the LUCIA source code included the OASIS3-MCT released package by

```

cd ${OASIS_DIR}/util/lucia
lucia -c

```

147 to obtain the executable file lucia.exe. \${OASIS\_DIR} is the path referring to the OASIS3-MCT directory.

148 Then, in the namcouple file, under the section \$NLOGPRT we set:

```

$NLOGPRT
1 -1

```

149 and then the coupled model for one month as normal. Consequently, in the working directory, some files  
 150 with name of lucia.xx.xxxxxx will be generated. In this working directory, we have to run two commands:

```

${OASIS_DIR}/util/lucia/lucia # generate oasis_balance.eps
ps2pdf oasis_balance.eps oasis_balance.pdf # convert to pdf file oasis_balance.pdf

```

151 to obtain oasis\_balance.eps and then oasis\_balance.pdf. File oasis\_balance.pdf includes a bar-chart showing  
 152 the calculation time and the coupling exchange duration including time spent to wait for the other model  
 153 components.

154 In this study, we conduct five one-month experiments using ICPL266 to find out the most suitable number  
 155 of nodes used for each model component. The five experiments are carried out with different numbers of  
 156 nodes (i.e. 25 nodes, 30 nodes and 40 nodes). The number of processors assigned to each model  
 157 component is listed in Table 3.

158 Figure S1 shows computation time (green bars) and coupling exchange time, including the time spent while  
 159 waiting for slower models (red bars) of the model components. In principle, the smaller the red bars, the  
 160 better the computational performance. Also, the red bars of ICON and NEMO should not be too different.  
 161 As a simpler model, HD runs on a single processor, so its running time (green bar) is the shortest and the  
 162 waiting time (red bar) the longest of the three models.

163 Figure S1 shows that Case C is the most balanced of the five experiments. In this case, 30 nodes were used,  
 164 the number of processors (in short procs) given to NEMO (2000 procs) and ICON (1839 procs) are similar.  
 165 The green and red bars of ICON and NEMO are similar. In Case A, 25 nodes were used, the number of  
 166 processors given to NEMO (1600 procs) is also very similar to that given to ICON (1599 procs), but the green  
 167 bars of this case are the highest of the five cases. These two cases have a different ratio of processors used  
 168 for NEMO. The best one (Case C) has  $NPX \times NPY = 50 \times 40$  while the worst one (Case A) has  $NPX \times NPY = 40 \times$   
 169  $40$ . Case B also uses 30 nodes like Case C, but with  $NPX \times NPY = 40 \times 40 = 1600$  and ICON uses 2239  
 170 processors. With more processors, ICON runs faster than NEMO in this case, so there is no balance. In Case  
 171 D uses 40 nodes, again 1600 processors for NEMO and an increased number of processors (3519 procs) for  
 172 ICON. Here, ICON runs as slow as NEMO, even though it uses more than twice as many processors as  
 173 NEMO. Case E also uses 40 nodes, but the number of processors for ICON and NEMO are not much different  
 174 (i.e. 2719 and 2400 procs). However, NEMO runs faster than ICON and the system takes a longer time to run  
 175 than in Case C. ICON with more processors in Case D and Case E is slower than on Case B and Case C with  
 176 less processors, which indicates that too many processors were used. The common recommendation for  
 177 ICON is to have at least 100 grid cells per processor, which would be about 2000 processors at maximum for  
 178 the EURO-CORDEX domain. These results indicate that not only the number of the nodes used, but also the  
 179 ratio of processors between ICON and NEMO, and the ratios of  $NPX$  and  $NPY$  for NEMO should be chosen  
 180 carefully. The optimal setup may be different on other computer systems. A more thorough analysis is  
 181 planned to be done with the new OASIS-MCT\_5.0 version of LUCIA.

182

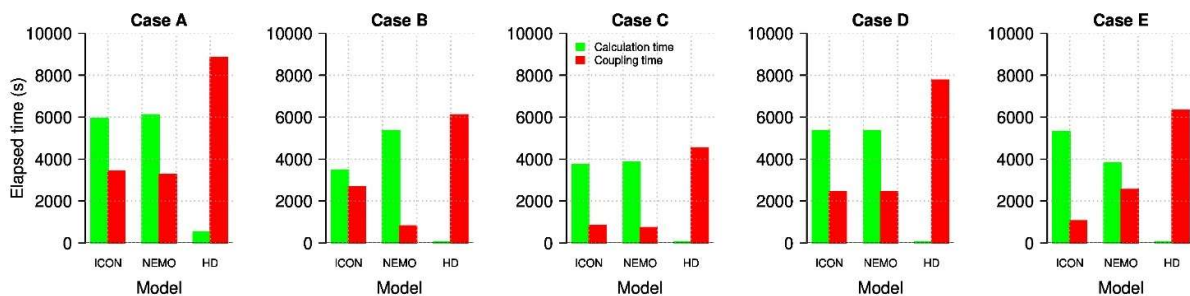

183

Figure S1: Calculation time (green) versus coupling exchange duration including time spent to wait for other model components (red). See table S3 for a detailed view of the node balance of the displayed cases.

184

185

a) ICPL266 - ICON266, T<sub>S</sub>

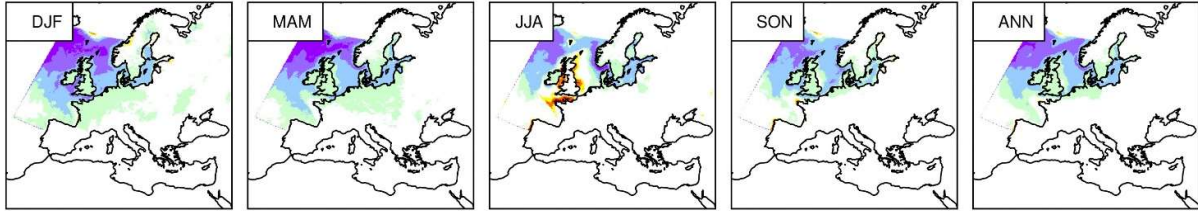

b) ICPL266 - ICON266, T<sub>2M</sub>

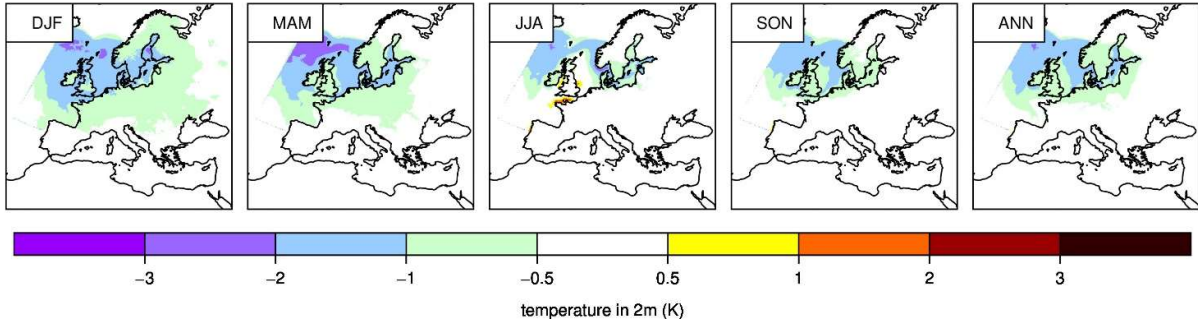

Figure S2: Seasonal (DJF, MAM, JJA, SON) and annual (ANN) T<sub>S</sub> and T<sub>2M</sub> (K) difference between ICPL266 compared to ICON266 for the period of 2010-2018.

a) ICON266

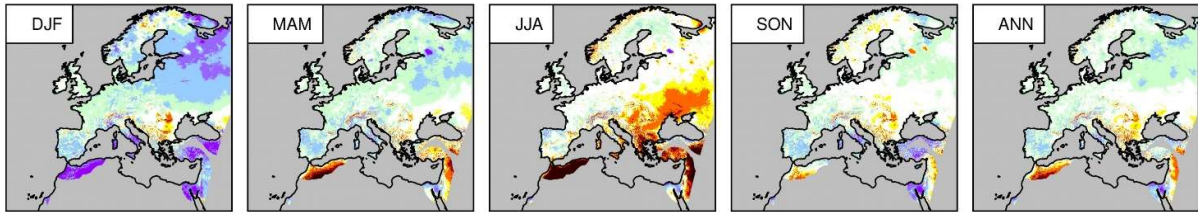

b) ICPL266

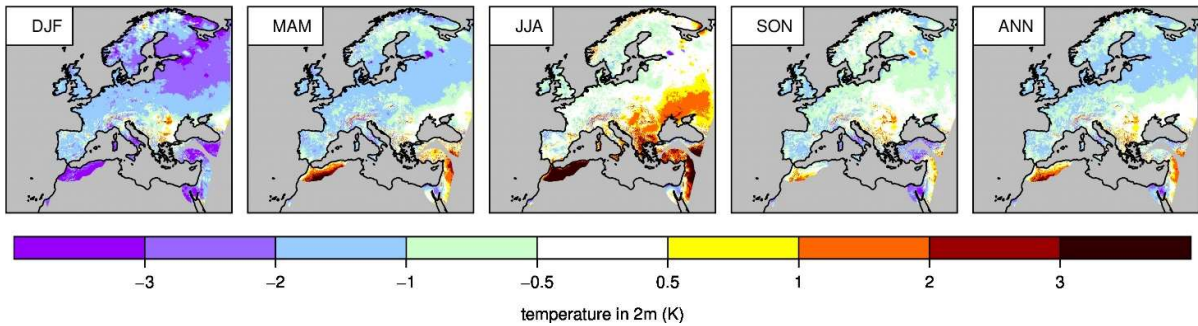

Figure S3: Seasonal (DJF, MAM, JJA, SON) and annual (ANN) bias of T<sub>2M</sub> (K) of a) ICON266 and b) ICPL266 compared to the E-OBS data for the period of 2010-2018.

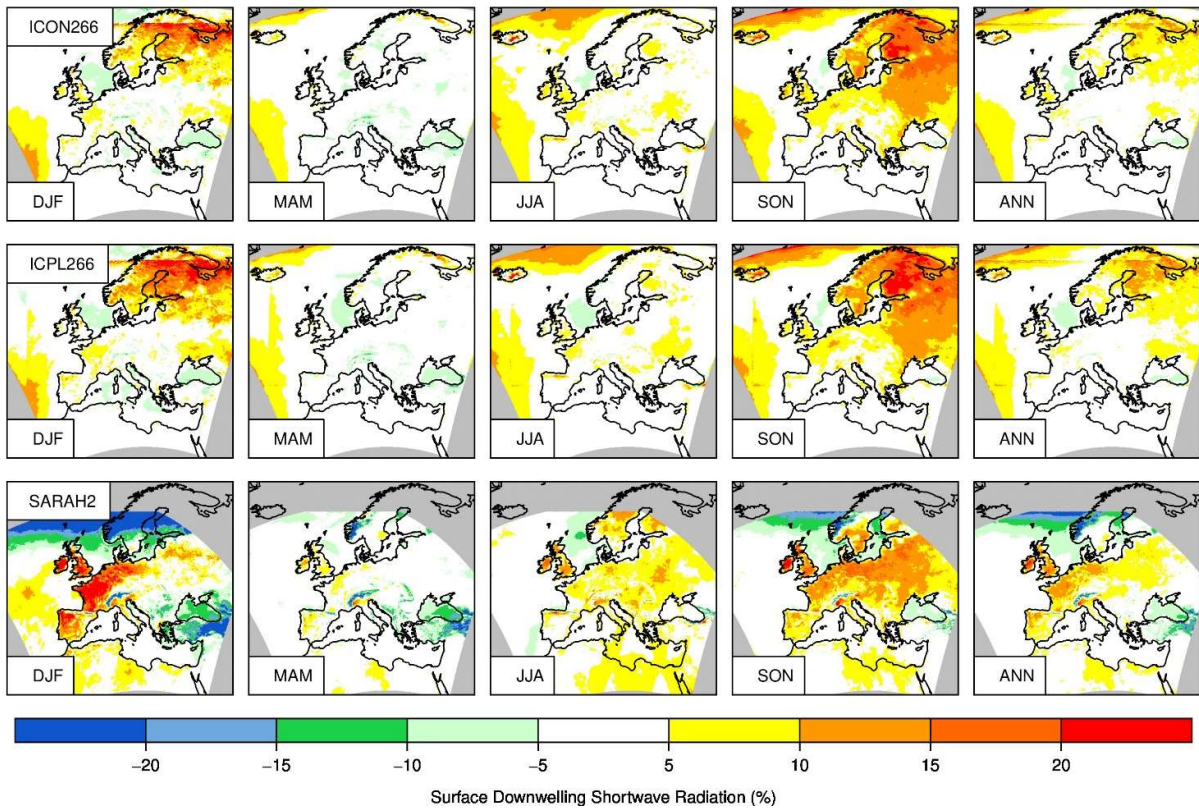

Figure S4: Seasonal (DJF, MAM, JJA, SON) and annual (ANN) of shortwave downward radiation difference (%) for ICON266 (top), ICPL266 (middle) and the SARAH2 data (bottom) compared to the ERA5 data for the period of 2010-2018.

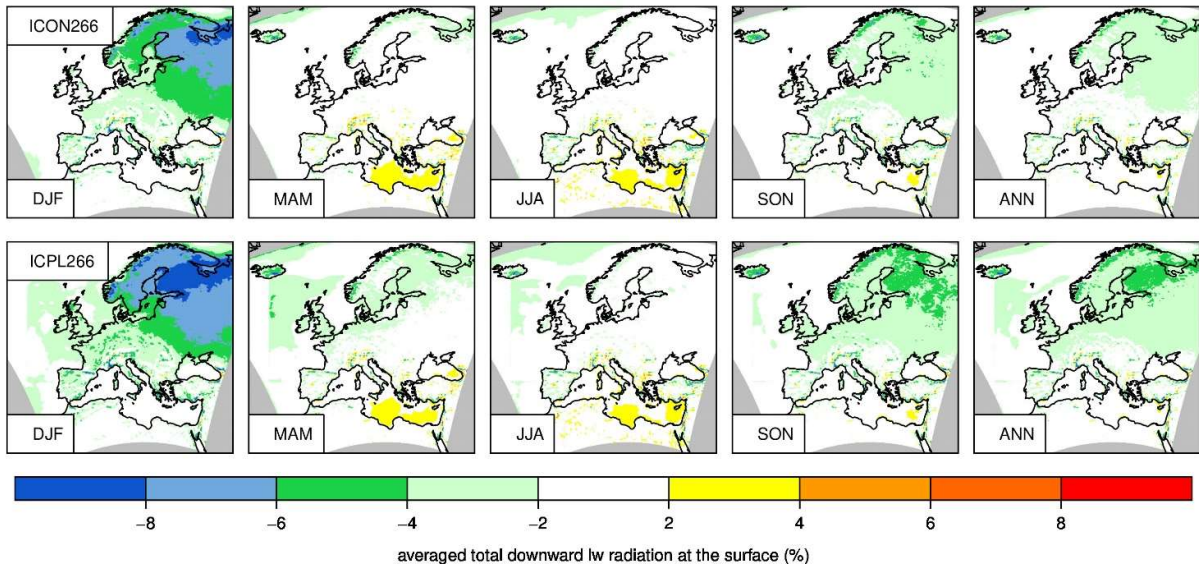

Figure S5: Seasonal (DJF, MAM, JJA, SON) and annual (ANN) of longwave downward radiation difference (%) for ICON266 (top), and ICPL266 (bottom) compared to the ERA5 data for the period of 2010-2018.

a) Shortwave downward radiation

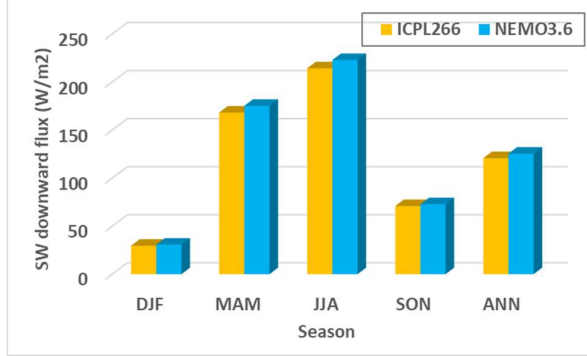

b) Longwave downward radiation

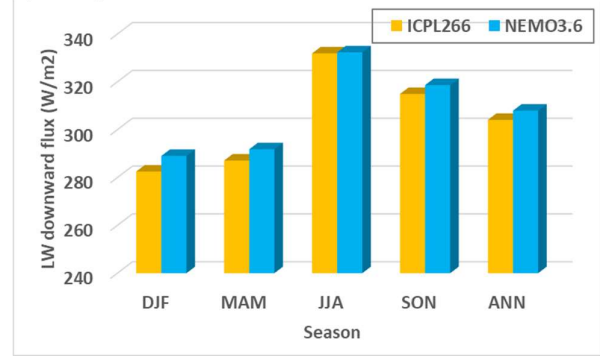

c) Sensible + Latent heat flux

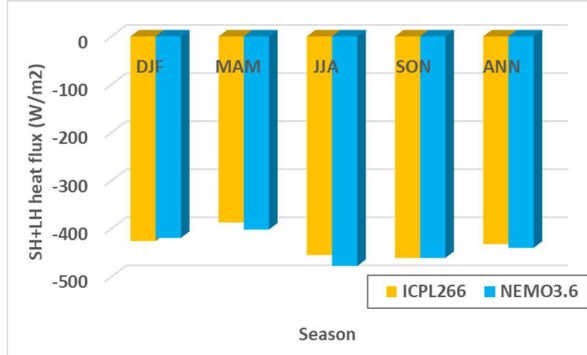

d) Net downward heat flux

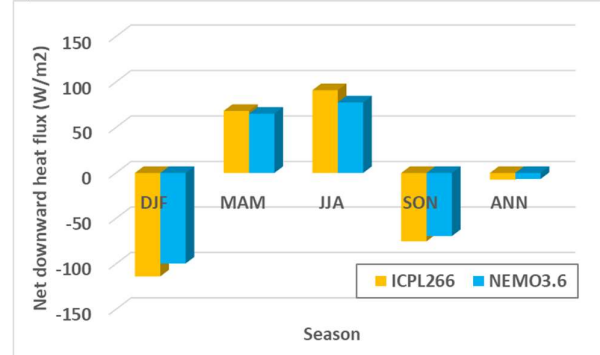

Figure S6: Seasonal flux ( $W/m^2$ , positive downward) of a) shortwave downward radiation, b) longwave downward radiation, c) sum of sensible and latent heat flux, and d) net downward heat flux of ICPL266 and NEMO3.6 averaged over the North Sea for the period of 2010-2018.

a) Shortwave downward radiation

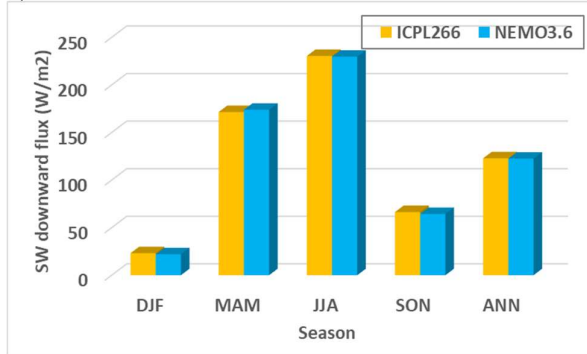

b) Longwave downward radiation

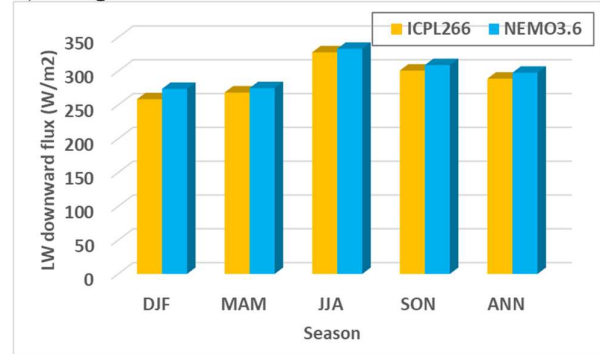

c) Sensible + Latent heat flux

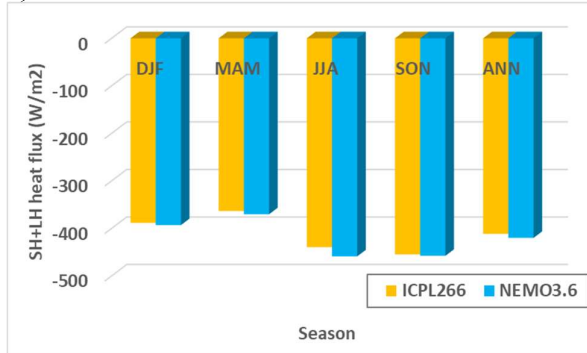

d) Net downward heat flux

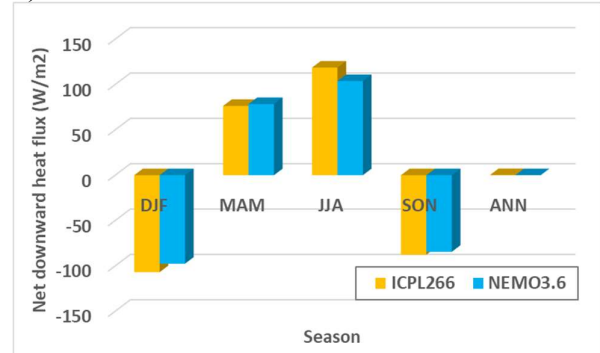

Figure S7: Similar to Figure S6 but for the Baltic Sea.

187

a) ICON266

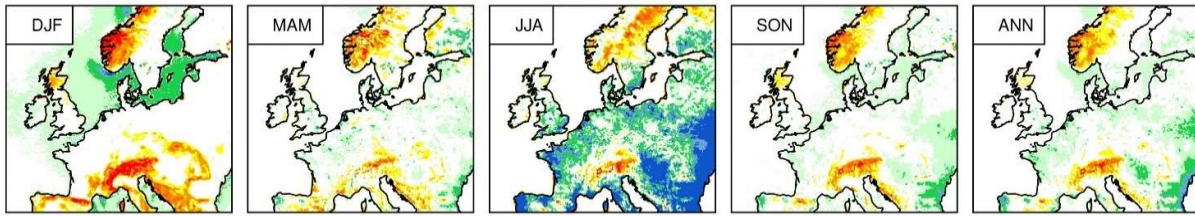

188

189

b) ICPL266

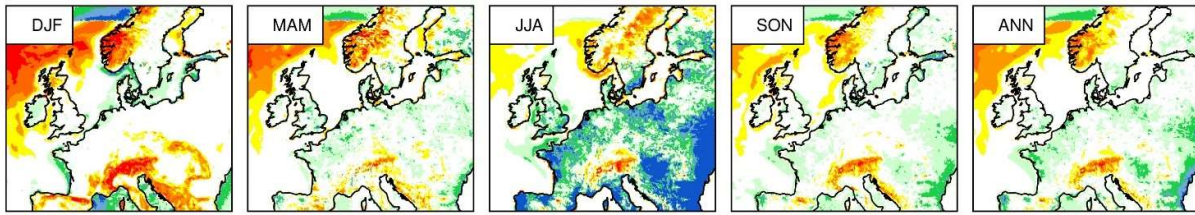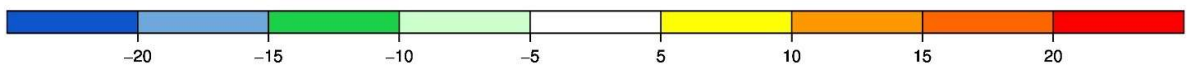

190

Figure S8: Seasonal (DJF, MAM, JJA, SON) and annual (ANN) mean of sensible heat flux ( $W/m^2$ , positive downward) difference for a) ICON266 and b) ICPL266 compared to the ERA5 data for the period of 2010-2018.

191

192

a) ICON266

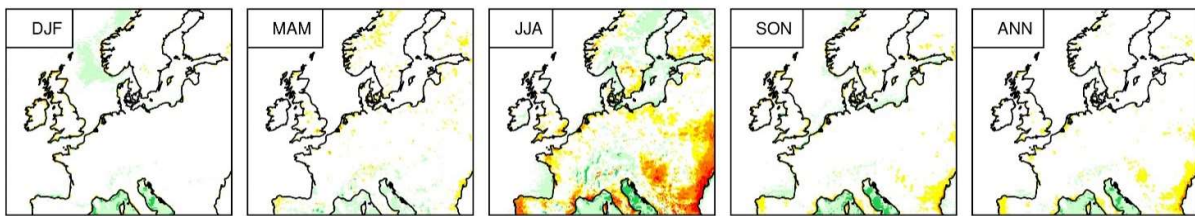

193

194

b) ICPL266

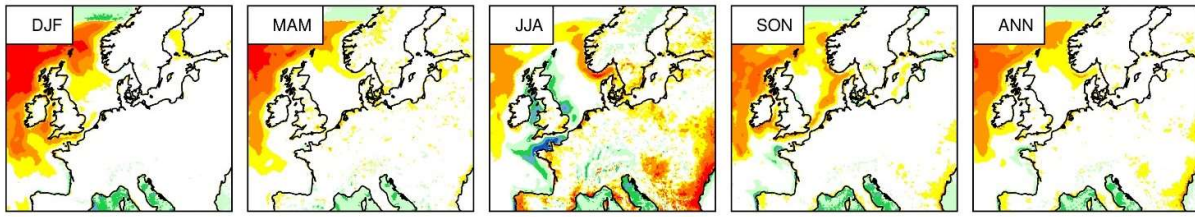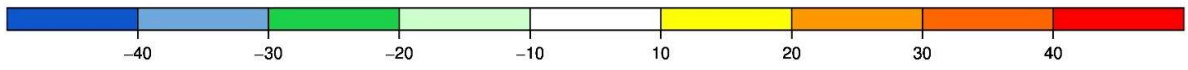

195

Figure S9: Seasonal (DJF, MAM, JJA, SON) and annual (ANN) mean of latent heat flux ( $W/m^2$ , positive downward) difference for a) ICON266 and b) ICPL266 compared to the ERA5 data for the period of 2010-2018.

196

197



198

a) ICON266

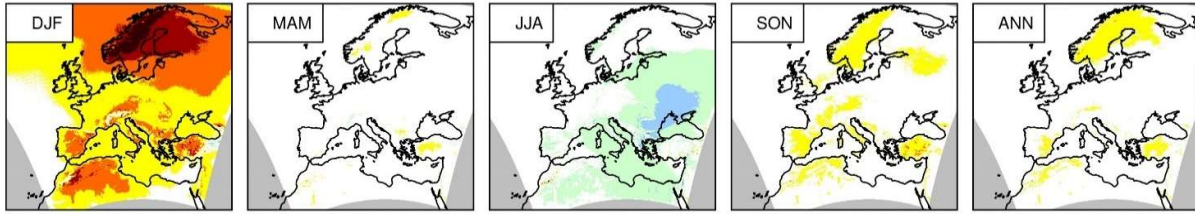

199

200

b) ICPL266

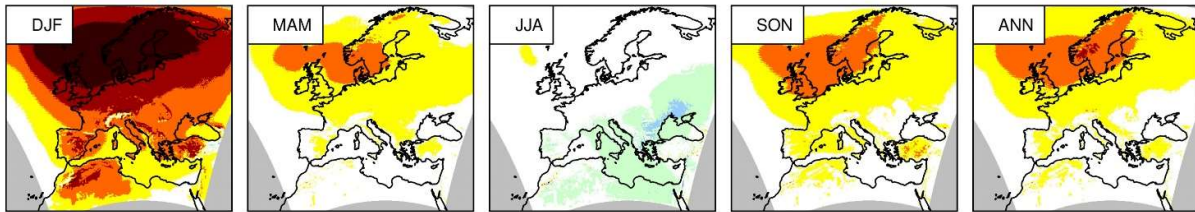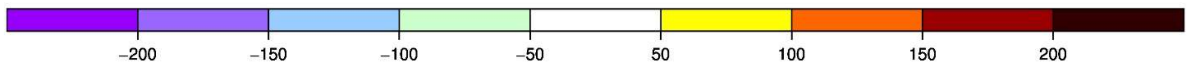

201

mean sea level pressure (Pa)

Figure S10: Seasonal (DJF, MAM, JJA, SON) and annual (ANN) mean of mean sea level pressure (Pa) difference for a) ICON266 and b) ICPL266 compared to the ERA5 reanalysis data for the period of 2010-2018.

202

a) ICON266

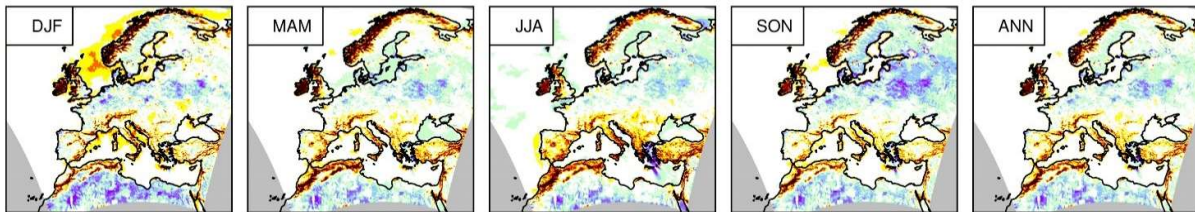

203

204

b) ICPL266

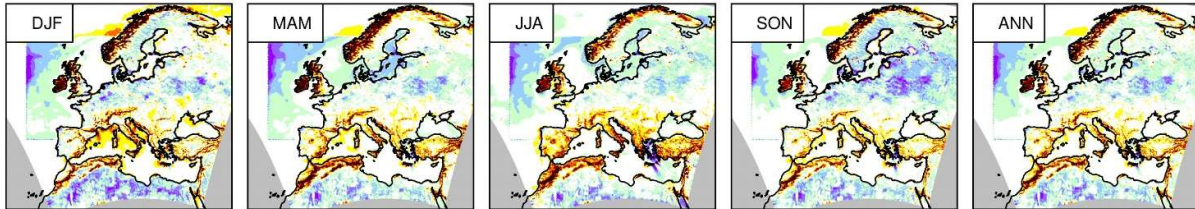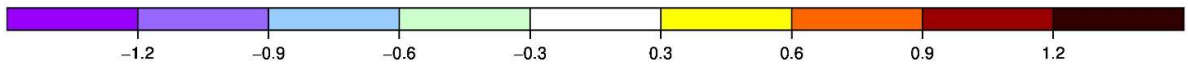

205

wind speed in 10m (m s<sup>-1</sup>)

Figure S11: Seasonal (DJF, MAM, JJA, SON) and annual (ANN) mean of 10-M wind speed (m/s) difference for a) ICON266 and b) ICPL266 compared to the ERA5 data for the period of 2010-2018.
